# Supplementary material for: Ideas and perspectives: patterns of soil CO 2 , CH 4 , and N 2 O fluxes along an altitudinal gradient – a pilot study from an Ecuadorian neotropical montane forest
Source: Copernicus journal article supplement (doi:10.5194/bg-18-413-2021), 2021-01-19
Supplement: Supplementary file 1 [file bg-18-413-2021-supplement.pdf]

Supplement of Biogeosciences, 18, 413–421, 2021  
<https://doi.org/10.5194/bg-18-413-2021-supplement>  
© Author(s) 2021. This work is distributed under  
the Creative Commons Attribution 4.0 License.

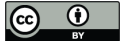

*Supplement of*

**Ideas and perspectives: patterns of soil CO<sub>2</sub>, CH<sub>4</sub>, and N<sub>2</sub>O fluxes along an altitudinal gradient – a pilot study from an Ecuadorian neotropical montane forest**

**Paula Alejandra Lamprea Pineda et al.**

*Correspondence to:* Paula Alejandra Lamprea Pineda ([paulaalejandra.lampreapineda@ugent.be](mailto:paulaalejandra.lampreapineda@ugent.be))

The copyright of individual parts of the supplement might differ from the CC BY 4.0 License.

## Supplementary information

### 1 Materials and methods

#### 1.1 Study areas

The fieldwork was carried out along an altitudinal gradient from lowland (400 m a.s.l.) to upper montane evergreen forests (3010 m a.s.l.; Table S2). We selected areas of well-preserved natural forests located on the western flanks of the Andes in northern Ecuador; specifically, in the Sierra region in the provinces of Imbabura and Pichincha. Four study sites (Fig. S1) were selected: Río Silanche at 400 m a.s.l. (hereinafter: S\_400), Milpe at 1100 m a.s.l. (hereinafter: M\_1100), El Cedral at 2200 m a.s.l. (hereinafter: C\_2200) and Peribuela at 3010 m a.s.l. (hereinafter: P\_3010). All sites experience two rainy seasons (March-April and October-November), with a mean annual precipitation (MAP) that varies on average between 900 and 3600 mm, and an adiabatic lapse rate of approx.  $-5\text{ }^{\circ}\text{C}$  per 1000 m of altitude (Table S2) (Varela and Ron, 2018).

#### 1.2 Sampling strategy

The sampling campaign took place from August 6<sup>th</sup> to September 28<sup>th</sup>, 2018, corresponding to the end of the dry season. One plot (20x20 m) was selected for each site, and within each plot, five polyvinyl chloride (PVC) collars were installed to allow *in-situ* measurements using a static flux chamber method. The collars were inserted at random locations within the plots but guaranteeing at least 7 m distance between each one. The insertion of the collars was performed at least 12 h before the first measurements, by applying even pressure across all points to minimize effects caused by soil disturbance. The chambers consisted of a PVC pipe hermetically sealed on top with a rubber-sealed lid. The chamber area was  $0.0191\text{ m}^2$  and the internal volume ranged between 3.63 and 3.98 L. Each chamber was equipped with sampling ports mounted with three-way valves, and a vent tube was installed to reduce pressure interferences.

Gas samples were collected mid-morning to avoid extreme temperatures and consider them as representative of a whole day (Collier et al., 2014; Luo and Zhou, 2006). Measurement cycles on each site consisted of four consecutive gas measurements once per day for one hour and during five contiguous days. For these measurements, the collars were left in place for the duration of each measurement cycle; thus, the analysis per stratum lasted 1 week (i.e. 1 month for all measurements in the 4 strata). However, in order to assess both short-term and long-term variations mainly related to weather conditions, the gas measurements were done first in August and consequently repeated in the next month (September).

Adjacent to each chamber ( $\sim 1\text{ m}$ ), one pit was dug for soil sampling, and intact soil cores were collected using stainless steel cylinders (diameter: 5.08 cm, height: 5.11 cm). The samples were taken at 5 and 20 cm depth once during the first month (August) of measurements. Each soil core was immediately packed into airtight zip-lock bags and once the sampling campaign was over, they were sent to Belgium (Ghent University) for physicochemical soil analysis. Bulk density ( $\rho_b$ ) was measured by oven drying ( $75^{\circ}\text{C}$  for 48 h) and weighing the soil samples. Soil porosity was derived from Eq. (1), assuming a particle density of  $2.65\text{ g cm}^{-3}$ . pH was measured by a potentiometric method using a pH-sensitive glass electrode, a standard reference electrode (HI 4222; Hanna Instruments, Bedfordshire, UK), and a volumetric ratio soil:liquid of 1:5 for  $\text{pH}_{\text{water}}$  (distilled water) and  $\text{pH}_{\text{KCl}}$  (1M KCl).  $\text{NO}_3^-$  and  $\text{NH}_4^+$  content was determined colorimetrically (Auto Analyzer 3; Bran and Luebbe, Norderstedt, Germany) after extractions performed with 1M KCl at room temperature and neutral pH. C and N concentrations (%C, %N), along with the stable N isotope signatures ( $\delta^{15}\text{N}$ ) of the soil samples, were determined at natural abundance by a Continuous Flow Element Analyzer (Automated Nitrogen Carbon Analyzer), interfaced with an Isotope-Ratio Mass Spectrometer (Sercon 20-20; Sercon, Cheshire, UK). Moreover, the soil samples taken at 5 and 20 cm depth were combined to produce one composite sample associated with each site, and by means of the method described by the International

Organization for Standardization (ISO 11277:2009), soil texture was determined. The classification of the soil was made according to the United States Department of Agriculture (USDA, 2017); and the soil class was determined based on the classification of FAO and UNESCO: World Reference Base for Soil Resources (WRB) (FAO, 2007).

$$Porosity [\%] = \left(1 - \frac{\rho_b [g\ cm^{-3}]}{2.65 [g\ cm^{-3}]}\right) \cdot 100\% \quad (1)$$

45 Daily measurements of soil moisture, expressed as water-filled pore space (WFPS), were taken per site at 5 and 20 cm depth using soil moisture sensors (EC-5, Meter Environment, Pullman, Washington, USA) and data loggers (ProCheck, Meter Environment, Pullman, Washington, USA). Finally, soil temperature was determined daily for each measurement cycle and per chamber, by means of a thermometer inserted at 5 cm depth and approximately 10 cm from each chamber.

### 1.2.1 Soil-atmosphere exchange

50 Each day, the chambers were closed for a period of 1 h. Samples of 20 mL were taken with disposable syringes from the headspace air every 20 minutes:  $T_1 = 0$ ,  $T_2 = 20$ ,  $T_3 = 40$  and  $T_4 = 60$  min;  $T_1$  or time-zero indicates the sample taken immediately after the chamber was closed. Before each sample collection, the syringe was flushed twice with the air of the chamber to mix the chamber headspace and to avoid any possible stratification of gases.

55 The 20 mL samples were injected in pre-evacuated 12 mL exetainer vials (over-pressurized), and once the sampling campaign was over, the samples were sent to Belgium (Ghent University) for gas chromatography analysis. For  $CH_4$  and  $CO_2$  analysis, a gas chromatograph (Finnigan Trace GC Ultra; Thermo Electron Corporation, Milan, Italy) equipped with a flame ionization detector (FID) and a thermal conductivity detector (TCD) was used, respectively. For  $N_2O$ , another gas chromatograph equipped with an electron capture detector (ECD) (Shimadzu GC-14B; Shimadzu Corporation, Tokyo, Japan) was used.

### 60 1.3 Data analysis

The fluxes for each gas ( $CO_2$ ,  $CH_4$  and  $N_2O$ ) were calculated by means of linear regressions using the four consecutive measurements of each measurement cycle. The slope of the regressions represented the flux. Thus, following the ideal gas law, and considering the headspace volume of the chamber and the chamber area, the net gas flux was calculated by Eq. (2) (Collier et al., 2014; Dalal et al., 2008; Kutzbach et al., 2007):

$$65 \quad F_c = \left(\frac{\Delta c [ppm]}{\Delta t [min]}\right) \cdot \left(\frac{P [atm]}{R [L\ atm\ mol^{-1}\ K^{-1}] \cdot T [K]}\right) \cdot (MW [g\ mol^{-1}]) \cdot \left(\frac{V_{ch} [L]}{A_{ch} [m^2]}\right) \quad (2)$$

where  $F_c$  corresponds to the net gas flux ( $CO_2$ ,  $CH_4$  or  $N_2O$ ),  $\Delta c/\Delta t$  is the rate of change of the gas concentration within the chamber or the slope of the regression line [ $ppm\ min^{-1}$  or  $\mu L\ L^{-1}\ min^{-1}$ ],  $P/RT$  corresponds to the ideal gas law used to convert concentration from volumetric to mass fraction at local temperature and pressure,  $R$  = gas law constant ( $0.08206\ L\ atm\ mol^{-1}\ k^{-1}$ );  $MW$  is the molecular weight of the gas ( $CO_2$ -C and  $CH_4$ -C:  $12.01\ g\ mol^{-1}$ ,  $N_2O$ -N:  $14.01\ g\ mol^{-1}$ ),  $V_{ch}$  is the headspace  
70 volume of the chamber, and  $A_{ch}$  the area of the chamber. The goodness-of-fit was evaluated for every linear regression using the adjusted coefficient of determination ( $R^2$ ), and time series (concentration vs time) with  $R^2 < 0.65$  were excluded from further analysis.

## 2. Results

### 75 2.1 Physicochemical soil properties

All soils along the altitudinal gradient are Andosols and the soil texture was classified (USDA) between loam and sandy loam at all sites (WRB; Table 2). All sites had a relatively acidic soil;  $\text{pH}_{\text{water}}$  ranged from strong to medium acidic (4.6 - 5.7), with an increase in acidity with depth, except at P\_3010 (Table 2). The most acidic soil was found at S\_400 at 5 cm, although not significantly different from M\_1100 and C\_2200; whereas the least acidic one at P\_3010 at 5 cm depth, and only significantly different from M\_1100. Except for P\_3010,  $\text{NO}_3\text{-N}$  concentrations were 2-4 times higher at 5 cm compared to 20 cm depth; the highest variability was observed at S\_400, and in comparison to the other sites, P\_3010 seems to be depleted in  $\text{NO}_3\text{-N}$  at both depths ( $0.8 - 3.6 \mu\text{g g}^{-1}$ ). In contrast, the highest concentration of  $\text{NH}_4\text{-N}$  was obtained at P\_3010 at 20 cm, followed by S\_400 at 5 cm. However, at all sites,  $\text{NH}_4\text{-N}$  concentrations at 5 cm were not significantly different from each other. Such as  $\text{NO}_3\text{-N}$ ,  $\text{NH}_4\text{-N}$  also decreased with depth, except at P\_3010 where the increase at 20 cm with respect to 5 cm was almost doubling. Higher N contents were measured at 5 cm compared to 20 cm depth at all sites; and S\_400 exhibited the highest content at both depths, 1.3-1.4 times higher than any other N percentage at the same depth, and even 4 times higher than any other N percentage at 20 cm depth. The C content showed a general decrease with depth at all sites, with the highest percentage at S\_400 at 5 cm, and the lowest one at M\_1100 at 20 cm. Higher  $\delta^{15}\text{N}$  signatures were obtained at 20 cm compared to 5 cm depth; at S\_400 the soil was most enriched in  $^{15}\text{N}$ , and P\_3010 showed the most depleted one.

90

Soil temperature decreased with altitude with a gradient of  $-4.2 \text{ }^\circ\text{C}$  per 1000 m, with no statistical difference between months (Fig. S2). WFPS increased significantly with depth at all sites during both months (Fig. S3), except at C\_2200 in September. The lowest WFPS at 5 cm depth was obtained at C\_2200 ( $16.8\% \pm 2.5$ ) and P\_3010 ( $14.4\% \pm 0.3$ ) in August and September, respectively, whereas the highest one at M\_1100 at 20 cm in both months (August:  $75.9\% \pm 0.3$ ; September:  $71.9\% \pm 6.3$ ).

### 95 2.2 Greenhouse gas fluxes

In general, all sites were sources of  $\text{CO}_2$  (Fig. 1a, Table 1). Except for P\_3010, mean  $\text{CO}_2$  emissions were higher in September compared to August, but due to the high variability in the measurements, there was no significant difference between months at M\_1100, C\_2200 and P\_3010 ( $P > 0.05$ ). The lowest and highest emissions were observed at C\_2200 (August and September) and P\_3010 (August), respectively. All mean  $\text{CH}_4$  fluxes were negative, indicating a net flux from the atmosphere to the soil (Fig. 1b, Table 1). Although the mean  $\text{CH}_4$  fluxes (except for P\_3010) were higher in September compared to August, there was no significant difference ( $P > 0.05$ ) between months at any site. Finally, the mean  $\text{N}_2\text{O}$  fluxes showed a general negative trend with increasing altitude (Fig. 1c). A marked net  $\text{N}_2\text{O}$  consumption was observed at the sites located at 2200 and 3010 m a.s.l.; however, there was no significant difference ( $P > 0.05$ ) in any plot between months. The highest consumption was observed in September at C\_2200, followed by P\_3010 in August, while the highest emission was in September at M\_1100 (Table 1).

105

Although only monthly average fluxes were discussed, the large variability observed with most of the gas fluxes (Table 1 and Fig. 1) are the result of the spatial (i.e. differences in GHG fluxes between chambers) and temporal (i.e. differences in GHG fluxes per day) variability within each site.

110

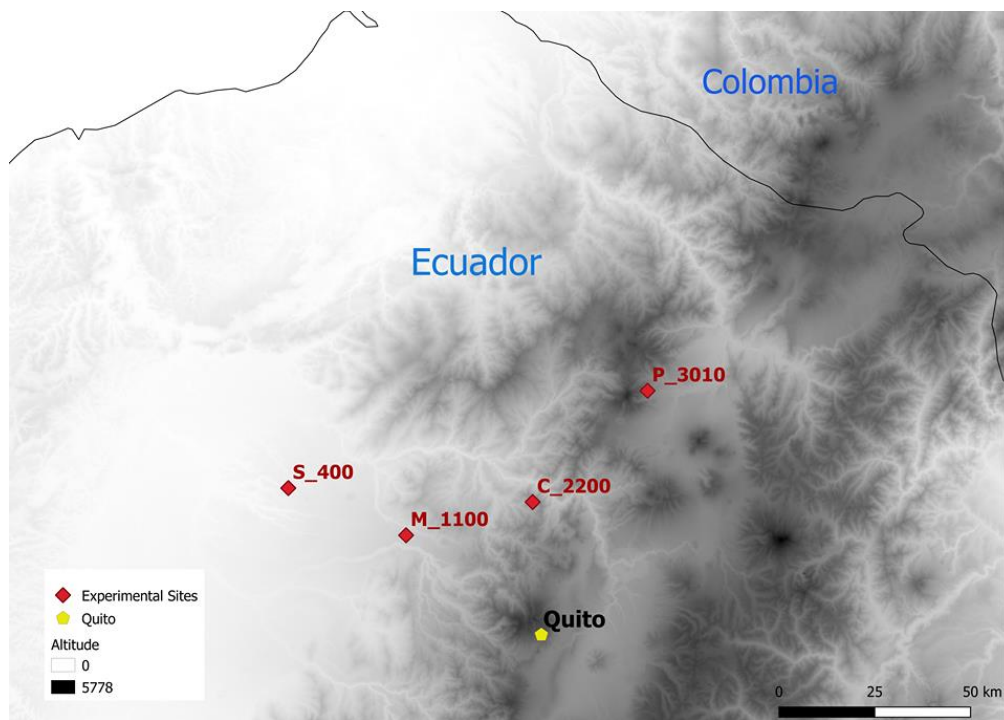

**Fig. S1.** Overview map with the location of the study areas: Río Silanche (400 m a.s.l.; S\_400), Milpe (1100 m a.s.l.; M\_1100), El Cedral (2200 m a.s.l.; C\_2200) and Peribuela (3010 m a.s.l.; P\_3010). Study areas projected on a DEM based on SRTM data (Jarvis et al., 2008).

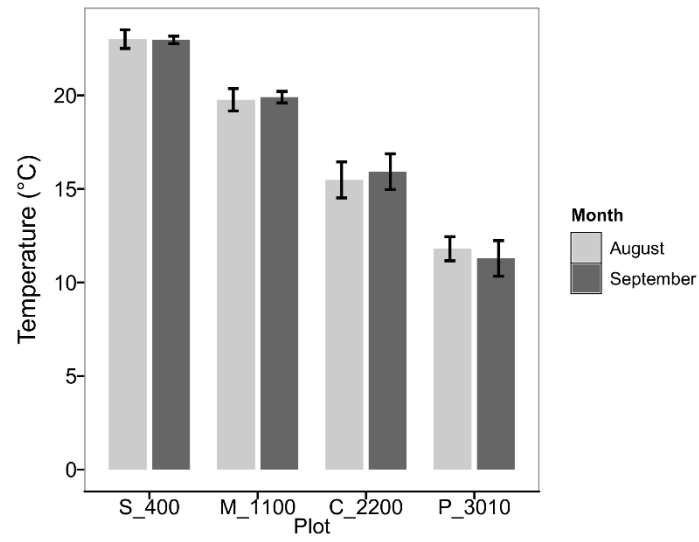

**Fig. S2.** Monthly average soil temperature ( $^{\circ}\text{C}$ ) $\pm$ standard deviations (SD) at Río Silanche (400 m a.s.l.; S\_400), Milpe (1100 m a.s.l.; M\_1100), El Cedral (2200 m a.s.l.; C\_2200) and Peribuela (3010 m a.s.l.; P\_3010). Light grey: average soil temperature in August; dark grey: average soil temperature in September.

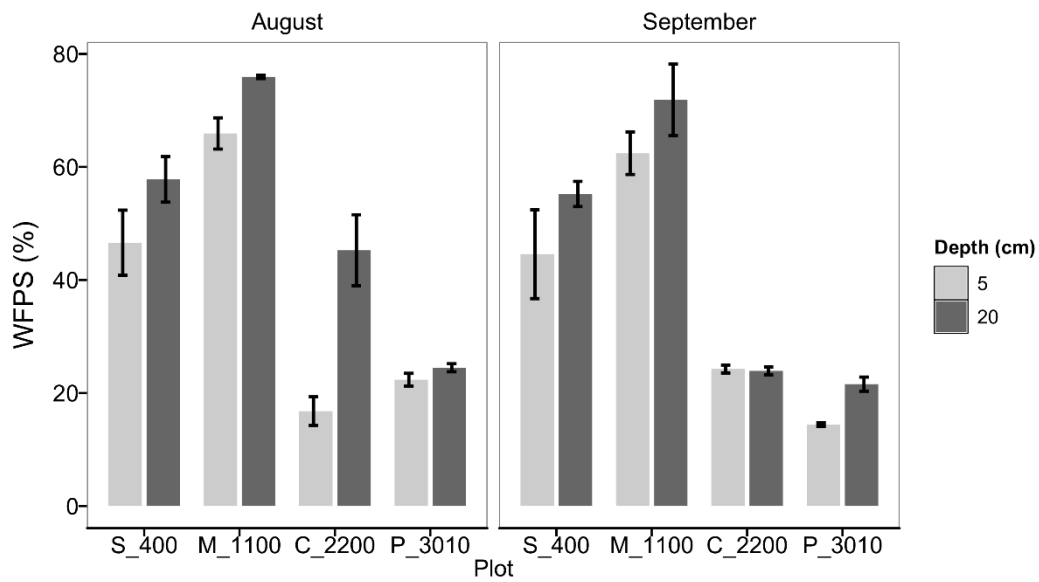

**Fig. S3.** Monthly average water-filled pore space (WFPS) $\pm$ standard deviations (SD) at Río Silanche (400 m a.s.l.; S\_400),  
 125 Milpe (1100 m a.s.l.; M\_1100), El Cedral (2200 m a.s.l.; C\_2200) and Peribuela (3010 m a.s.l.; P\_3010) at 5 and 20 cm depth.  
 Light grey: average WFPS at 5 cm, dark grey: average WFPS at 20 cm.

**Table S1.** Measured and estimated annual CO<sub>2</sub>, CH<sub>4</sub> and N<sub>2</sub>O fluxes from tropical forest soils of South America including elevation, mean annual precipitation (MAP), mean annual temperature (MAT) and period of measurement. N.R. stands for not reported.

| Country | Elevation<br>(m a.s.l.) | MAP<br>(mm)<br>MAT (°C) | Measured CO <sub>2</sub> flux<br>(g CO <sub>2</sub> -C m <sup>-2</sup> h <sup>-1</sup> ) and<br>period of<br>measurement | Estimated<br>annual CO <sub>2</sub><br>flux (Mg CO <sub>2</sub> -<br>C ha <sup>-1</sup> y <sup>-1</sup> ) | Measured CH <sub>4</sub> flux<br>(µg CH <sub>4</sub> -C m <sup>-2</sup> h <sup>-1</sup> ) and<br>period of<br>measurement | Estimated<br>annual CH <sub>4</sub><br>flux (kg CH <sub>4</sub> -<br>C ha <sup>-1</sup> y <sup>-1</sup> ) | Measured N <sub>2</sub> O flux<br>(µg N <sub>2</sub> O-N m <sup>-2</sup> h <sup>-1</sup> )<br>and period of<br>measurement | Estimated<br>annual N <sub>2</sub> O<br>flux (kg N <sub>2</sub> O-N<br>ha <sup>-1</sup> y <sup>-1</sup> ) | Reference                              |
|---------|-------------------------|-------------------------|--------------------------------------------------------------------------------------------------------------------------|-----------------------------------------------------------------------------------------------------------|---------------------------------------------------------------------------------------------------------------------------|-----------------------------------------------------------------------------------------------------------|----------------------------------------------------------------------------------------------------------------------------|-----------------------------------------------------------------------------------------------------------|----------------------------------------|
| Brazil  | 50                      | 2000<br>-               | N.R.                                                                                                                     | N.R.                                                                                                      | -11.5<br>April 1983                                                                                                       | N.R.                                                                                                      | 43.6<br>April 1983                                                                                                         | N.R.                                                                                                      | (Keller et al.,<br>1983)               |
| Brazil  | 50                      | 2000<br>-               | N.R.                                                                                                                     | N.R.                                                                                                      | 0.7; -22.3<br>December 1983, and<br>March 1984                                                                            | N.R.                                                                                                      | 13.1; 31.0<br>December 1983, and<br>March 1984                                                                             | N.R.                                                                                                      | (Keller et al.,<br>1986)               |
| Brazil  | 54                      | 2200<br>-               | N.R.                                                                                                                     | N.R.                                                                                                      | N.R.                                                                                                                      | N.R.                                                                                                      | 15-35<br>April 1987-April 1988                                                                                             | 1.9                                                                                                       | (Luizão et al.,<br>1989)               |
| Brazil  | 130                     | 1750<br>-               | Dry season: 240±20<br>November 1992 <sup>3</sup> ;<br>Wet season: 290±20<br>May 1992 <sup>3</sup>                        | N.R.                                                                                                      | N.R.                                                                                                                      | N.R.                                                                                                      | N.R.                                                                                                                       | N.R.                                                                                                      | (Davidson<br>and<br>Trumbore,<br>1995) |
| Brazil  | 150                     | 2200<br>25.5            | N.R.                                                                                                                     | N.R.                                                                                                      | -3.42 to -5.93 kg CH <sub>4</sub> -C ha <sup>-1</sup> y <sup>-1</sup><br>June 1992-December 1993 <sup>1</sup>             |                                                                                                           | N.R.                                                                                                                       | N.R.                                                                                                      | (Steudler et<br>al., 1996)             |
| Brazil  | 130                     | 1850<br>N.R.            | N.R.                                                                                                                     | N.R.                                                                                                      | N.R.                                                                                                                      | N.R.                                                                                                      | <i>Fazenda Vitória –<br/>Primary forest</i><br>Dry season: 10.4±0.8<br>Wet season: 52.3±4<br>February 1995-May<br>1996     | 2.43                                                                                                      | (Verchot et<br>al., 1999)              |
|         |                         |                         |                                                                                                                          |                                                                                                           |                                                                                                                           |                                                                                                           | <i>Fazenda Vitória –<br/>Secondary forest</i><br>Dry season: 6.9±1.1<br>Wet season: 16.2±1.3<br>February 1995-May<br>1996  | 0.94                                                                                                      |                                        |



|               |                                   |                   |                                                                 |      |                                                                      |      |                                                                                                          |      |                               |
|---------------|-----------------------------------|-------------------|-----------------------------------------------------------------|------|----------------------------------------------------------------------|------|----------------------------------------------------------------------------------------------------------|------|-------------------------------|
|               |                                   |                   | N.R.                                                            | N.R. | N.R.                                                                 | N.R. | <i>Fazenda São José</i><br>5.4±1.6<br>July 1996                                                          | N.R. |                               |
|               |                                   |                   | N.R.                                                            | N.R. | N.R.                                                                 | N.R. | <i>Fazenda São Sebastião</i><br>2.0±0.7<br>July 1996                                                     | N.R. |                               |
| <b>Brazil</b> | 130                               | 1800<br>N.R.      | N.R.                                                            | 20   | N.R.                                                                 | N.R. | N.R.                                                                                                     | N.R. | (Davidson et al., 2000)       |
|               | 130                               | 1800<br>N.R.      | N.R.                                                            | 18   | N.R.                                                                 | N.R. | N.R.                                                                                                     | N.R. |                               |
| <b>Brazil</b> | 130                               | 1850<br>N.R.      | Dry season: 181±9<br>Wet season: 299±14<br>April 1995-May 1996  | 20   | Dry season: -30.6±6.6<br>Wet season: 0.9±6.6<br>April 1995-May 1996  | -1.6 | N.R.                                                                                                     | N.R. | (Verchot et al., 2000)        |
|               | 130 (Secondary forest since 1976) | 1850<br>N.R.      | Dry season: 174±10<br>Wet season: 245±10<br>April 1995-May 1996 | 17.9 | Dry season: -10.6±5.6<br>Wet season: -6.2±2.5<br>April 1995-May 1996 | -0.7 | N.R.                                                                                                     | N.R. |                               |
| <b>Brazil</b> | 145                               | 2200<br>25.6      | N.R.                                                            | N.R. | N.R.                                                                 | N.R. | 1.94±0.22 kg N <sub>2</sub> O-N ha <sup>-2</sup> y <sup>-1</sup><br>June 1992-January 1996               |      | (Melillo et al., 2001)        |
| <b>Brazil</b> | 150                               | 2270<br>18.8-25.6 | N.R.                                                            | N.R. | N.R.                                                                 | N.R. | Dry season: 1.3<br>August-September 1998<br>Wet season: 76.4,<br>February-March 1998;<br>67.0 March 1999 | N.R. | (Garcia-Montiel et al., 2001) |
| <b>Brazil</b> | 150                               | 2270<br>25.6      | 129.21± 31.93<br>November 2001                                  | N.R. | N.R.                                                                 | N.R. | 13.13± 3.75<br>November 2001                                                                             | N.R. | (Garcia-Montiel et al., 2003) |
| <b>Brazil</b> | 200                               | 2000<br>25        | N.R. <sup>2</sup>                                               | N.R. | N.R. <sup>2</sup>                                                    | N.R. | 185 (clay soil), 15<br>(sandy soil)<br>June-August 2000                                                  | N.R. | (Varner et al., 2003)         |
| <b>Brazil</b> | 150                               | 2090-2270         | <i>Nova Vida 1</i><br>148.1±9.7                                 | N.R. | N.R.                                                                 | N.R. | <i>Nova Vida 1</i><br>27.3±4.6                                                                           | N.R. |                               |

|               |     |                 |                                                                                                              |      |      |           |                                                                                                             |                                                                |
|---------------|-----|-----------------|--------------------------------------------------------------------------------------------------------------|------|------|-----------|-------------------------------------------------------------------------------------------------------------|----------------------------------------------------------------|
|               |     | 18.8-25.6       | 1992-1999                                                                                                    |      |      | 1992-1999 |                                                                                                             |                                                                |
|               |     |                 | <i>Nova Vida 2</i><br>155.5±18.5<br>1992-1993                                                                | N.R. | N.R. | N.R.      | <i>Nova Vida 2</i><br>19.2±7.0<br>1992-1993                                                                 | N.R.                                                           |
|               |     |                 | <i>Proto Velho</i><br>163.92<br>October 1993 and<br>March 1994                                               | N.R. | N.R. | N.R.      | <i>Proto Velho</i><br>25.2<br>October 1993 and<br>March 1994                                                | N.R.                                                           |
|               |     |                 | <i>Jamari</i><br>151.09<br>October 1993 and<br>March 1994                                                    | N.R. | N.R. | N.R.      | <i>Jamari</i><br>34.5<br>October 1993 and<br>March 1994                                                     | N.R.                                                           |
|               |     |                 | <i>Cacaulândia</i><br>159.01<br>October 1993 and<br>March 1994                                               | N.R. | N.R. | N.R.      | <i>Cacaulândia</i><br>34.3<br>October 1993 and<br>March 1994                                                | N.R.                                                           |
|               |     |                 | <i>Ouro Preto</i><br>144.7<br>October 1993 and<br>March 1994                                                 | N.R. | N.R. | N.R.      | <i>Ouro Preto</i><br>30.5<br>October 1993 and<br>March 1994                                                 | N.R.                                                           |
|               |     |                 | <i>Vilhena</i><br>161.4<br>October 1993 and<br>March 1994                                                    | N.R. | N.R. | N.R.      | <i>Vilhena</i><br>28.1<br>October 1993 and<br>March 1994                                                    | N.R.                                                           |
| <b>Brazil</b> | 200 | 2000<br>21 - 23 | 10.0±0.9 Mg CO <sub>2</sub> -C ha <sup>-1</sup> y <sup>-1</sup><br>September 1998-December 2002 <sup>1</sup> |      |      |           | 2.6±1.0 kg N <sub>2</sub> O-N ha <sup>-2</sup> y <sup>-1</sup><br>September 1998-December 2002 <sup>1</sup> | (Davidson et al., 2004)                                        |
| <b>Brazil</b> | 200 | 2000<br>25      | 138.4±4.3 (clay soil),<br>160.0±8.6 (sandy soil)<br>June 2000-May 2001                                       | N.R. |      |           | 130±10 (clay soil),<br>14±2 (sandy soil)<br>June 2000-July 2011                                             | N.R. (Silver et al., 2005)                                     |
| <b>Brazil</b> | 200 | 2000<br>21 - 23 | 12.8±1.0 Mg CO <sub>2</sub> -C ha <sup>-1</sup> y <sup>-1</sup><br>September 1998-April 2005 <sup>1</sup>    |      |      |           | 2.1±0.7 kg N <sub>2</sub> O-N ha <sup>-2</sup> y <sup>-1</sup><br>September 1998-April 2005 <sup>1</sup>    | (Davidson et al., 2008)                                        |
| <b>Brazil</b> | 100 | 3050            | N.R.                                                                                                         | 13.3 |      |           | -2.7±0.5 kg CH <sub>4</sub> -C ha <sup>-1</sup> y <sup>-1</sup>                                             | 3.4±0.4 kg N <sub>2</sub> O-N ha <sup>-2</sup> y <sup>-1</sup> |

(Garcia-Montiel et al., 2004)

|                |                                          |                     |                                                                                                                                                        |      |                                                                                                                                                         |      |                                                                                                                                                           |                           |                       |
|----------------|------------------------------------------|---------------------|--------------------------------------------------------------------------------------------------------------------------------------------------------|------|---------------------------------------------------------------------------------------------------------------------------------------------------------|------|-----------------------------------------------------------------------------------------------------------------------------------------------------------|---------------------------|-----------------------|
|                |                                          | 19.1 - 25.5         |                                                                                                                                                        |      | September 2006-August 2007 <sup>1</sup>                                                                                                                 |      | September 2006-August 2007 <sup>1</sup>                                                                                                                   |                           |                       |
|                | 400                                      | 3050<br>19.1 - 25.5 | N.R.                                                                                                                                                   | 13.6 | -4.9±8.0 kg CH <sub>4</sub> -C ha <sup>-1</sup> y <sup>-1</sup><br>September 2006-August 2007 <sup>1</sup>                                              |      | 0.9±0.1 kg N <sub>2</sub> O-N ha <sup>-2</sup> y <sup>-1</sup><br>September 2006-August 2007 <sup>1</sup>                                                 | (Sousa Neto et al., 2011) |                       |
|                | 1000                                     | 2300<br>19.1 - 25.5 | N.R.                                                                                                                                                   | 12.9 | -4.4±0.3 kg CH <sub>4</sub> -C ha <sup>-1</sup> y <sup>-1</sup><br>September 2006-August 2007 <sup>1</sup>                                              |      | 0.8±0.2 kg N <sub>2</sub> O-N ha <sup>-2</sup> y <sup>-1</sup><br>September 2006-August 2007 <sup>1</sup>                                                 |                           |                       |
| <b>Ecuador</b> | 400                                      | 4500<br>-           | 171.6<br>August 1984                                                                                                                                   | N.R. | 19.4<br>August 1984                                                                                                                                     | N.R. | 7.5<br>August 1984                                                                                                                                        | N.R.                      | (Keller et al., 1986) |
|                | 400 (Secondary forest of 5-10 years old) | 4500<br>-           | 117.0<br>August 1984                                                                                                                                   | N.R. | -25.1<br>August 1984                                                                                                                                    | N.R. | 7.4<br>August 1984                                                                                                                                        | N.R.                      |                       |
| <b>Ecuador</b> | 1000                                     | 2230<br>19.4        | N.R.                                                                                                                                                   | N.R. | N.R.                                                                                                                                                    | N.R. | 0.2±0.1 (lower slope), 0.3±0.1 (mid-slope),<br>0.4±0.1 (ridge) kg N <sub>2</sub> O-N ha <sup>-2</sup> y <sup>-1</sup><br>May 2008-May 2009 <sup>1</sup>   | (Wolf et al., 2011)       |                       |
|                | 2000                                     | 1950<br>15.7        | N.R.                                                                                                                                                   | N.R. | N.R.                                                                                                                                                    | N.R. | 1.3±0.2 (lower slope), 0.3±0.1 (mid-slope),<br>0.1±0.1 (ridge) kg N <sub>2</sub> O-N ha <sup>-2</sup> y <sup>-1</sup><br>May 2008-May 2009 <sup>1</sup>   |                           |                       |
|                | 3000                                     | 4500<br>9.4         | N.R.                                                                                                                                                   | N.R. | N.R.                                                                                                                                                    | N.R. | 1.1±0.1 (lower slope), 0.1±0.1 (mid-slope),<br>-0.05±0.1 (ridge) kg N <sub>2</sub> O-N ha <sup>-2</sup> y <sup>-1</sup><br>May 2008-May 2009 <sup>1</sup> |                           |                       |
| <b>Ecuador</b> | 1000                                     | 2230<br>19.4        | 10.3±0.8 (lower slope), 10.3±0.1 (mid-slope), 9.8±0.9 (ridge) Mg CO <sub>2</sub> -C ha <sup>-1</sup> y <sup>-1</sup><br>May 2008-May 2009 <sup>1</sup> |      | -5.5±0.7 (lower slope), -5.4±0.9 (mid-slope), -5.9±1.0 (ridge) kg CH <sub>4</sub> -C ha <sup>-1</sup> y <sup>-1</sup><br>May 2008-May 2009 <sup>1</sup> |      | N.R.                                                                                                                                                      | N.R.                      | (Wolf et al., 2012)   |
|                | 2000                                     | 1950<br>15.7        | 8.8±0.4 (lower slope), 7.6±0.6 (mid-slope), 6.7±0.7 (ridge) Mg CO <sub>2</sub> -C ha <sup>-1</sup> y <sup>-1</sup><br>May 2008-May 2009 <sup>1</sup>   |      | -2.3±0.3 (lower slope), -4.3±0.9 (mid-slope), -2.7±0.3 (ridge) kg CH <sub>4</sub> -C ha <sup>-1</sup> y <sup>-1</sup><br>May 2008-May 2009 <sup>1</sup> |      | N.R.                                                                                                                                                      | N.R.                      |                       |
|                | 3000                                     | 4500<br>9.4         | 6.4±0.4 (lower slope), 5.7±0.7 (mid-slope), 3.7±0.5 (ridge) Mg CO <sub>2</sub> -C ha <sup>-1</sup> y <sup>-1</sup><br>May 2008-May 2009 <sup>1</sup>   |      | -0.6±1.2 (lower slope), -1.6±0.4 (mid-slope), -1.0±0.1 (ridge) kg CH <sub>4</sub> -C ha <sup>-1</sup> y <sup>-1</sup><br>May 2008-May 2009 <sup>1</sup> |      | N.R.                                                                                                                                                      | N.R.                      |                       |
| <b>Ecuador</b> | 1000                                     | 2230<br>19.4        | N.R.                                                                                                                                                   | N.R. | N.R.                                                                                                                                                    | N.R. | 0.2±0.1 (2008), 0.5±0.1 (2009) kg N <sub>2</sub> O-N ha <sup>-2</sup> y <sup>-1</sup><br>January 2008-September 2009 <sup>1</sup>                         | (Martinson et al., 2013)  |                       |

|                      |         |                              |                                                                                                                                                                                                                                                         |      |                                                                                                                                                                                                                                                          |      |                                                                                                                                                                                                                                                             |                   |                          |
|----------------------|---------|------------------------------|---------------------------------------------------------------------------------------------------------------------------------------------------------------------------------------------------------------------------------------------------------|------|----------------------------------------------------------------------------------------------------------------------------------------------------------------------------------------------------------------------------------------------------------|------|-------------------------------------------------------------------------------------------------------------------------------------------------------------------------------------------------------------------------------------------------------------|-------------------|--------------------------|
|                      | 2000    | 1950<br>15.7                 | N.R.                                                                                                                                                                                                                                                    | N.R. | N.R.                                                                                                                                                                                                                                                     | N.R. | 0.2± 0.03 (2008), 0.1±0.2 (2009) kg N <sub>2</sub> O-N ha <sup>-2</sup> y <sup>-1</sup><br>January 2008-September 2009                                                                                                                                      |                   |                          |
|                      | 3000    | 4500<br>9.4                  | N.R.                                                                                                                                                                                                                                                    | N.R. | N.R.                                                                                                                                                                                                                                                     | N.R. | -0.03± 0.1 (2008), -0.3±0.3 (2009) kg N <sub>2</sub> O-N ha <sup>-2</sup> y <sup>-1</sup><br>January 2008-September 2009                                                                                                                                    |                   |                          |
| <b>Ecuador</b>       | 1000    | 2230<br>19.4                 | N.R.                                                                                                                                                                                                                                                    | N.R. | N.R.                                                                                                                                                                                                                                                     | N.R. | 0.57±0.26 kg N <sub>2</sub> O-N ha <sup>-1</sup> y <sup>-1</sup><br>November 2010-August 2012 <sup>1</sup>                                                                                                                                                  |                   |                          |
|                      | 2000    | 1950<br>15.4                 | N.R.                                                                                                                                                                                                                                                    | N.R. | N.R.                                                                                                                                                                                                                                                     | N.R. | 0.17±0.06 kg N <sub>2</sub> O-N ha <sup>-1</sup> y <sup>-1</sup><br>November 2010-August 2012 <sup>1</sup>                                                                                                                                                  |                   | (Müller et al., 2015)    |
|                      | 3000    | 4500<br>9.4                  | N.R.                                                                                                                                                                                                                                                    | N.R. | N.R.                                                                                                                                                                                                                                                     | N.R. | 0.05±0.04 kg N <sub>2</sub> O-N ha <sup>-2</sup> y <sup>-1</sup><br>November 2010-August 2012 <sup>1</sup>                                                                                                                                                  |                   |                          |
| <b>French Guiana</b> | 49      | 2200<br>26                   | 99.4<br>July-September 1994                                                                                                                                                                                                                             | N.R. | N.R.                                                                                                                                                                                                                                                     | N.R. | N.R.                                                                                                                                                                                                                                                        | N.R.              | (Janssens et al., 1998)  |
| <b>French Guiana</b> | 30      | 2771.2±62<br>8.8<br>27.3±0.5 | N.R.                                                                                                                                                                                                                                                    | N.R. | N.R.                                                                                                                                                                                                                                                     | N.R. | 15.83±2.1<br>April 2010-April 2011                                                                                                                                                                                                                          | 1.32 <sup>5</sup> | (Petitjean et al., 2015) |
| <b>French Guiana</b> | 147-194 | 2990-3041<br>25.7            | <i>Nouragues forest</i><br>Dry season:<br>92.6±34.3 (top hill),<br>89.9±37.8 (middle slope),<br>131.0±64.2 (bottom slope)<br>October 2015<br>Wet season:<br>159±36.5 (top hill),<br>191.7±66.5 (middle slope),<br>188.8±50.2 (bottom slope)<br>May 2016 | N.R. | <i>Nouragues forest</i><br>Dry season:<br>-64.0±69.7 (top hill),<br>6.6±237.9 (middle slope),<br>-49.9±50.1 (bottom slope)<br>October 2015<br>Wet season:<br>-19.9±70.3 (top hill),<br>43.2±274.0 (middle slope),<br>9.4±64.9 (bottom slope)<br>May 2016 | N.R. | <i>Nouragues forest</i><br>Dry season:<br>-20.4±15.0 (top hill),<br>-20.1±17.4 (middle slope),<br>-32.5±21.6 (bottom slope)<br>October 2015<br>Wet season:<br>-30.7±30.9 (top hill),<br>-31.9±15.5 (middle slope),<br>-55.4±47.6 (bottom slope)<br>May 2016 | N.R.              | (Courtois et al., 2018)  |

|                          |            |                         |                                                                                                                                                                                                                                                                |      |                                                                                                                                                                                                                                                               |            |                                                                                                                                                                                                                                                                  |           |                              |
|--------------------------|------------|-------------------------|----------------------------------------------------------------------------------------------------------------------------------------------------------------------------------------------------------------------------------------------------------------|------|---------------------------------------------------------------------------------------------------------------------------------------------------------------------------------------------------------------------------------------------------------------|------------|------------------------------------------------------------------------------------------------------------------------------------------------------------------------------------------------------------------------------------------------------------------|-----------|------------------------------|
|                          |            |                         | <i>Paracou forest</i><br>Dry season:<br>165.2±50.2 (top hill),<br>131.7±34.3 (middle<br>slope), 189.6±96.8<br>(bottom slope)<br>October 2015<br>Wet season:<br>161.6±62.9 (top hill),<br>138.3±88.7 (middle<br>slope), 94.8±57.4<br>(bottom slope)<br>May 2016 | N.R. | <i>Paracou forest</i><br>Dry season:<br>-44.0±139.7 (top hill), -<br>19.9±79.5 (middle<br>slope), 6.6±103.7<br>(bottom slope)<br>October 2015<br>Wet season:<br>3.7±40.1 (top hill), -<br>1.9±41.2 (middle<br>slope), 23.9±34.6<br>(bottom slope)<br>May 2016 | N.R.       | <i>Paracou forest</i><br>Dry season:<br>-31.2±27.5 (top hill),<br>-41.4±54.5 (middle<br>slope), -35.7±21.8<br>(bottom slope)<br>October 2015<br>Wet season:<br>-49.7±49.8 (top hill), -<br>19.3±45.1 (middle<br>slope), -18.0±70.9<br>(bottom slope)<br>May 2016 | N.R.      |                              |
| <b>French<br/>Guiana</b> | 40.        | 2929 <sup>4</sup><br>27 | Dry season:<br>99.6±7.9<br>Wet season:<br>111.3±5<br>May 2011-November<br>2014                                                                                                                                                                                 | N.R. | Dry season:<br>-12.9±10.8<br>Wet season:<br>-12.1±9.2<br>May 2011-November<br>2014                                                                                                                                                                            | N.R.       | Dry season:<br>8.3±2.1<br>Wet season:<br>12.9±1.7<br>May 2011-November<br>2014                                                                                                                                                                                   | N.R.      | (Petitjean et<br>al., 2019)  |
| <b>Peru</b>              | 180        | 2200<br>26              | N.R.                                                                                                                                                                                                                                                           | N.R. | -29.0 to -32.1<br>October 1997-October<br>1999                                                                                                                                                                                                                | -2.6       | 8.1 to 18.8<br>October 1997-October<br>1999                                                                                                                                                                                                                      | 0.80      | (Palm et al.,<br>2002)       |
|                          | 200        | 2700<br>26.4            | Dry season:<br>0.19±0.01 <sup>6</sup><br>2007                                                                                                                                                                                                                  | N.R. | N.R.                                                                                                                                                                                                                                                          | N.R.       | N.R.                                                                                                                                                                                                                                                             | N.R.      |                              |
| <b>Peru</b>              | 1000       | 3100<br>21.3            | Dry season:<br>0.18±0.007 <sup>6</sup><br>2007                                                                                                                                                                                                                 | N.R. | N.R.                                                                                                                                                                                                                                                          | N.R.       | N.R.                                                                                                                                                                                                                                                             | N.R.      | (Zimmermann<br>et al., 2009) |
|                          | 1500       | 2600<br>18.3            | Dry season:<br>1.17±0.007 <sup>6</sup><br>2007                                                                                                                                                                                                                 | N.R. | N.R.                                                                                                                                                                                                                                                          | N.R.       | N.R.                                                                                                                                                                                                                                                             | N.R.      |                              |
|                          | 3030       | 1700<br>12.5            | Dry season:<br>0.18±0.008 <sup>6</sup><br>2007                                                                                                                                                                                                                 | N.R. | N.R.                                                                                                                                                                                                                                                          | N.R.       | N.R.                                                                                                                                                                                                                                                             | N.R.      |                              |
| <b>Peru</b>              | 600 - 1200 | 5318                    | N.R.                                                                                                                                                                                                                                                           | N.R. | Dry season:<br>-13.3±4.6                                                                                                                                                                                                                                      | -0.14±0.12 | Dry season:<br>40.0±19.6                                                                                                                                                                                                                                         | 0.54±0.32 |                              |

|             |             |              |                                                                                      |      |                                                                                          |            |                                                                                       |           |                         |
|-------------|-------------|--------------|--------------------------------------------------------------------------------------|------|------------------------------------------------------------------------------------------|------------|---------------------------------------------------------------------------------------|-----------|-------------------------|
|             |             | 23.4         |                                                                                      |      | Wet season:<br>21.3±17.1<br>July 2011 – December<br>2011                                 |            | Wet season:<br>-6.3±17.9<br>July 2011 – December<br>2011                              |           |                         |
|             | 1200 - 2200 | 2631<br>18.8 | N.R.                                                                                 | N.R. | Dry season:<br>-35.0±2.9<br>Wet season:<br>-20.4±5.4<br>December 2010 -<br>December 2011 | -0.69±0.09 | Dry season:<br>40.8±9.6<br>Wet season:<br>6.7±5.4<br>December 2010 -<br>December 2011 | 0.50±0.13 | (Teh et al.,<br>2014)   |
|             | 2200 - 3200 | 1706<br>12.5 | N.R.                                                                                 | N.R. | Dry season:<br>-50.8±1.7<br>Wet season:<br>-22.5±4.6<br>December 2010 -<br>December 2011 | 0.80±0.08  | Dry season:<br>7.9±7.1<br>Wet season:<br>0.8±9.2<br>December 2010 -<br>December 2011  | 0.12±0.13 |                         |
|             | 1070 - 1088 | 5300<br>23.4 | Dry season:<br>216.7±12.5<br>Wet season:<br>212.5±12.5<br>July 2011-June 2013        | N.R. | Dry season:<br>-8.3±4.2<br>Wet season:<br>-4.2±4.2<br>July 2011-June 2013                | N.R.       | N.R.                                                                                  | N.R.      |                         |
| <b>Peru</b> | 1532 - 1769 | 2600<br>18.8 | Dry season:<br>179.2±12.5<br>Wet season:<br>170.8±12.5<br>February 2011-June<br>2013 | N.R. | Dry season:<br>-45.8±4.2<br>Wet season:<br>-1.34±4.2<br>February 2011-June<br>2013       | N.R.       | N.R.                                                                                  | N.R.      | (Jones et al.,<br>2016) |
|             | 2811 - 2962 | 1700<br>12.5 | Dry season:<br>210.8±12.5<br>Wet season:<br>166.7±12.5<br>February 2011-June<br>2013 | N.R. | Dry season:<br>-66.7±4.2<br>Wet season:<br>-45.8±4.2<br>February 2011-June<br>2013       | N.R.       | N.R.                                                                                  | N.R.      |                         |

130 <sup>1</sup>Measured mean annual fluxes.

<sup>2</sup>Soil-atmosphere fluxes of CO<sub>2</sub> and CH<sub>4</sub> were measured weekly during June-August 2000, but average values are not reported.

<sup>3</sup>Measured CO<sub>2</sub> fluxes from the soil surface.

<sup>4</sup>Average of the annual rainfall measured at the experimental site during 4 years.

<sup>5</sup>Cumulative N<sub>2</sub>O fluxes from the 11/05/2010 to the 09/05/2011

135 <sup>6</sup>Values for undisturbed “native” soil. This study evaluated the climate dependence of heterotrophic soil respiration from a soil-translocation experiment. As a matter of comparison with the others studies, only control cores are depicted, i.e. soil cores re-installed at the same site.

140 **Table S2.** Characteristics of the study areas Río Silanche (400 m a.s.l.; S\_400), Milpe (1100 m a.s.l.; M\_1100), El Cedral (2200 m a.s.l.; C\_2200) and Peribuela (3010 m a.s.l.; P\_3010), including mean annual precipitations (MAP) and mean annual temperatures (MAT) extracted from the Worldclim data set, using average monthly data from 1970-2000 with a spatial resolution of ~1 km<sup>2</sup> (Fick and R.J. Hijmans, 2017). Forest classification has been done based on the system used by the country (FAO, 2017; Ministerio del Ambiente, 2015).

| Study area    | Forest type                       | Coordinates     |                 | Altitude (m a.s.l.) | MAP (mm) | MAT (°C) |
|---------------|-----------------------------------|-----------------|-----------------|---------------------|----------|----------|
|               |                                   | Latitude        | Longitude       |                     |          |          |
| <b>S_400</b>  | Lowland evergreen forest of Choco | 00°08'45.58'' N | 79°08'34.22'' W | 400                 | 3633     | 23.0     |
| <b>M_1100</b> | Andean foothill evergreen         | 00°02'07.17'' N | 78°51'59.72'' W | 1100                | 2856     | 21.1     |
| <b>C_2200</b> | Andean montane evergreen          | 00°06'47.87'' N | 78°34'10.88'' W | 2200                | 1464     | 16.8     |
| <b>P_3010</b> | Upper montane evergreen           | 00°22'27.35'' N | 78°18'0.36'' W  | 3010                | 956      | 12.8     |

145 Note: the coordinates were taken at the center of the plots.



## References

- 150 Collier, S. M., Ruark, M. D., Oates, L. G., Jokela, W. E. and Dell, C. J.: Measurement of greenhouse gas flux from agricultural soils using static chambers, *J. Vis. Exp.*, 90, 1–8, doi:10.3791/52110, 2014.
- Courtois, E. A., Stahl, C., Van den Berge, J., Bréchet, L., Van Langenhove, L., Richter, A., Urbina, I., Soong, J. L., Peñuelas, J. and Janssens, I. A.: Spatial variation of soil CO<sub>2</sub>, CH<sub>4</sub> and N<sub>2</sub>O fluxes across topographical positions in tropical forests of the Guiana Shield, *Ecosystems*, 21, 1445–1458, doi:10.1007/s10021-018-0232-6, 2018.
- 155 Dalal, R. C., Allen, D. E., Livesley, S. J. and Richards, G.: Magnitude and biophysical regulators of methane emission and consumption in the Australian agricultural, forest, and submerged landscapes: A review, *Plant Soil*, 309, 43–76, doi:10.1007/s11104-007-9446-7, 2008.
- Davidson, E. A. and Trumbore, S. E.: Gas diffusivity and production of CO<sub>2</sub> in deep soils of the eastern Amazon, *Tellus B Chem. Phys. Meteorol.*, 47, 550–565, doi:10.3402/tellusb.v47i5.16071, 1995.
- 160 Davidson, E. A., Verchot, L. V., Henrique Cattânio, J., Ackerman, I. L. and Carvalho, J. E. M.: Effects of soil water content on soil respiration in forests and cattle pastures of eastern Amazonia, *Biogeochemistry*, 48, 53–69, doi:10.1023/A:1006204113917, 2000.
- Davidson, E. A., Yoko Ishida, F. and Nepstad, D. C.: Effects of an experimental drought on soil emissions of carbon dioxide, methane, nitrous oxide, and nitric oxide in a moist tropical forest, *Glob. Chang. Biol.*, 10, 718–730, doi:10.1111/j.1529-165 8817.2003.00762.x, 2004.
- Davidson, E. A., Nepstad, D. C., Ishida, F. Y. and Brando, P. M.: Effects of an experimental drought and recovery on soil emissions of carbon dioxide, methane, nitrous oxide, and nitric oxide in a moist tropical forest, *Glob. Chang. Biol.*, 14, 2582–2590, doi:10.1111/j.1365-2486.2008.01694.x, 2008.
- FAO: Digital Soil Map of the World, GeoNetwork [online] Available from:
- 170 <http://www.fao.org/geonetwork/srv/en/main.home?uuid=446ed430-8383-11db-b9b2-000d939bc5d8> (Accessed 1 May 2019), 2007.
- FAO: National forest assessments - Country projects. Overview - Ecuador. Proyecto evaluación nacional forestal del Ecuador [National forestry evaluation project of Ecuador], [online] Available from: <http://www.fao.org/forestry/17847/en/ecu/> (Accessed 1 March 2019), 2017.
- 175 Fick, S. E. and R.J. Hijmans: Worldclim 2: New 1-km spatial resolution climate surfaces for global land areas., *Int. J. Climatol.*, 2017.
- Garcia-Montiel, D. C., Steudler, P. A., Piccolo, M. C., Melillo, J. M., Neill, C. and Cerri, C. C.: Controls on soil nitrogen oxide emissions from forest and pastures in the Brazilian Amazon, *Global Biogeochem. Cycles*, 15, 1021–1030, doi:10.1029/2000GB001349, 2001.
- 180 Garcia-Montiel, D. C., Melillo, J. M., Steudler, P. A., Cerri, C. C. and Piccolo, M. C.: Carbon limitations to nitrous oxide emissions in a humid tropical forest of the Brazilian Amazon, *Biol. Fertil. Soils*, 38, 267–272, doi:10.1007/s00374-003-0637-y, 2003.
- Garcia-Montiel, D. C., Melillo, J. M., Steudler, P. A., Tian, H., Neill, C., Kicklighter, D. W., Feigl, B., Piccolo, M. and Cerri, C. C.: Emissions of N<sub>2</sub>O and CO<sub>2</sub> from terra firme forests in Radônia, Brazil, *Ecol. Appl.*, 14, 214–220, doi:10.1890/01-6023-185 2004.
- Janssens, I. A., Barigah, T. and Ceulemans, R.: Soil CO<sub>2</sub> efflux rates in different tropical vegetation types in French Guiana, *Ann. For. Sci.*, 55, 671–680, doi:10.1051/forest, 1998.
- Jarvis, A., Reuter, H. I., Nelson, A. and Guevara, E.: Hole-filled seamless SRTM data V4, International Centre for Tropical Agriculture (CIAT), [online] Available from: <http://srtm.csi.cgiar.org>, 2008.
- 190 Jones, S. P., Diem, T., Huaraca Quispe, L. P., Cahuana, A. J., Reay, D. S., Meir, P. and Teh, Y. A.: Drivers of atmospheric

- methane uptake by montane forest soils in the southern Peruvian Andes, *Biogeosciences*, 13, 4151–4165, doi:10.5194/bg-13-4151-2016, 2016.
- Keller, M., Goreau, T. J., Wofsy, S. C., Kaplan, W. A. and McElroy, M. B.: Production of nitrous oxide and consumption of methane by forest soils, *Geophys. Res. Lett.*, 10, 1156–1159, doi:doi.org/10.1029/GL010i012p01156, 1983.
- 195 Keller, M., Kaplan, W. A. and Wofsy, S. C.: Emissions of N<sub>2</sub>O, CH<sub>4</sub> and CO<sub>2</sub> from tropical forest soils, *J. Geophys. Res.*, 91, 11791–11802, doi:10.1029/jd091id11p11791, 1986.
- Kutzbach, L., J., S., Sachs, T., Giebels, M., H., N., Shurpali, N. J., Martikainen, P. J., Alm, J. and Wilmking, M.: CO<sub>2</sub> flux determination by closed-chamber methods can be seriously biased by inappropriate application of linear regression, *Biogeosciences*, 4, 1005–1025, doi:10.5194/bgd-4-2279-2007, 2007.
- 200 Luizão, F., Matson, P., Livingston, G., Luizão, R. and Vitousek, P.: Nitrous oxide flux following tropical land clearing, *Global Biogeochem. Cycles*, 3, 281–285, doi:10.1029/GB003i003p00281, 1989.
- Luo, Y. and Zhou, X.: Temporal and spatial variation in soil respiration, in *Soil Respiration and the Environment*, pp. 108–131, Elsevier Inc., San Diego, U.S.A., 2006.
- Martinson, G. O., Corre, M. D. and Veldkamp, E.: Responses of nitrous oxide fluxes and soil nitrogen cycling to nutrient additions in montane forests along an elevation gradient in southern Ecuador, *Biogeochemistry*, 112, 625–636, doi:10.1007/s10533-012-9753-9, 2013.
- 205 Melillo, J. M., Steudler, P. A., Feigl, B. J., Neill, C., Garcia, D., Piccolo, M. C., Cerri, C. C. and Tian, H.: Nitrous oxide emissions from forests and pastures of various ages in the Brazilian Amazon, *J. Geophys. Res. Atmos.*, 106, 34179–34188, doi:10.1029/2000JD000036, 2001.
- 210 Ministerio del Ambiente: Estadísticas de Patrimonio Natural. Datos de bosques, ecosistemas, especies, carbono y deforestación del Ecuador continental [Statistics of Natural Heritage. Data on forests, ecosystems, species, carbon and deforestation of continental Ecuador], Ministerio del Ambiente, Quito, Ecuador., 2015.
- Müller, A. K., Matson, A. L., Corre, M. D. and Veldkamp, E.: Soil N<sub>2</sub>O fluxes along an elevation gradient of tropical montane forests under experimental nitrogen and phosphorus addition, *Front. Earth Sci.*, 3, 1–12, doi:10.3389/feart.2015.00066, 2015.
- 215 Palm, C. A., Alegre, J. C., Arevalo, L., Mutuo, P. K., Mosier, A. R. and Coe, R.: Nitrous oxide and methane fluxes in six different land use systems in the Peruvian Amazon, *Global Biogeochem. Cycles*, 16, 21-1-21–13, doi:10.1029/2001gb001855, 2002.
- Petitjean, C., Hénault, C., Perrin, A.-S., Pontet, C., Metay, A., Bernoux, M., Jehanno, T., Viard, A. and Roggy, J. C.: Soil N<sub>2</sub>O emissions in French Guiana after the conversion of tropical forest to agriculture with the chop-and-mulch method, *Agric. Ecosyst. Environ.*, 208, 64–74, doi:10.1016/j.agee.2015.04.004, 2015.
- 220 Petitjean, C., Le Gall, C., Pontet, C., Fujisaki, K., Garric, B., Horth, J.-C., Hénault, C. and Perrin, A.-S.: Soil N<sub>2</sub>O, CH<sub>4</sub>, and CO<sub>2</sub> fluxes in forest, grassland, and tillage/no-tillage croplands in French Guiana (Amazonia), *Soil Syst.*, 33, 1–20, doi:10.3773/j.issn.1005-264x.2009.03.021, 2019.
- Silver, W. L., Thompson, A. W., McGroddy, M. E., Varner, R. K., Dias, J. D., Silva, H., Crill, P. M. and Keller, M.: Fine root dynamics and trace gas fluxes in two lowland tropical forest soils, *Glob. Chang. Biol.*, 11, 290–306, doi:10.1111/j.1365-2486.2005.00903.x, 2005.
- 225 Sousa Neto, E., Carmo, J. B., Keller, M., Martins, S. C., Alves, L. F., Vieira, S. A., Piccolo, M. C., Camargo, P., Couto, H. T. Z., Joly, C. A. and Martinelli, L. A.: Soil-atmosphere exchange of nitrous oxide, methane and carbon dioxide in a gradient of elevation in the coastal Brazilian Atlantic forest, *Biogeosciences*, 8, 733–742, doi:10.5194/bg-8-733-2011, 2011.
- 230 Steudler, P. A., Melillo, J. M., Feigl, B. J., Neill, C., Piccolo, M. C. and Cerri, C. C.: Consequence of forest-to-pasture conversion on CH<sub>4</sub> fluxes in the Brazilian Amazon Basin, *J. Geophys. Res. Atmos.*, 101, 18547–18554, doi:10.1029/96jd01551, 1996.

- 235 Teh, Y. A., Diem, T., Jones, S., Huaraca Quispe, L. P., Baggs, E., Morley, N., Richards, M., Smith, P. and Meir, P.: Methane and nitrous oxide fluxes across an elevation gradient in the tropical Peruvian Andes, *Biogeosciences*, 11, 2325–2339, doi:10.5194/bg-11-2325-2014, 2014.
- USDA: Natural Resources Conservation Service. Soil Texture Calculator, [online] Available from: [https://www.nrcs.usda.gov/wps/portal/nrcs/detail/soils/survey/?cid=nrcs142p2\\_054167](https://www.nrcs.usda.gov/wps/portal/nrcs/detail/soils/survey/?cid=nrcs142p2_054167) (Accessed 16 April 2019), 2017.
- 240 Varela, L. A. and Ron, S. R.: Geografía y Clima del Ecuador [Geography and climate of Ecuador]. BIOWEB. Pontificia Universidad Católica del Ecuador., [online] Available from: <https://bioweb.bio/faunaweb/reptiliaweb/GeografiaClima/> (Accessed 2 March 2019), 2018.
- Varner, R. K., Keller, M., Robertson, J. R., Dias, J. D., Silva, H., Crill, P. M., McGroddy, M. and Silver, W. L.: Experimentally induced root mortality increased nitrous oxide emission from tropical forest soils, *Geophys. Res. Lett.*, 30, 1–4, doi:10.1029/2002GL016164, 2003.
- 245 Verchot, L. V., Davidson, E. A., Cattfinio, J. H., Ackerman, I. L., Erickson, H. E. and Keller, M.: Land use change and biogeochemical controls of nitrogen oxide emissions from soils in eastern Amazonia, *Global Biogeochem. Cycles*, 13, 31–46, doi:10.1029/1998GB900019, 1999.
- Verchot, L. V., Davidson, E. A., Cattânio, J. H. and Ackerman, I. L.: Land-use change and biogeochemical controls of methane fluxes in soils of eastern Amazonia, *Ecosystems*, 3, 41–56, doi:10.1007/s100210000009, 2000.
- 250 Wolf, K., Veldkamp, E., Homeier, J. and Martinson, G. O.: Nitrogen availability links forest productivity, soil nitrous oxide and nitric oxide fluxes of a tropical montane forest in southern Ecuador, *Global Biogeochem. Cycles*, 25, 1–12, doi:10.1029/2010GB003876, 2011.
- Wolf, K., Flessa, H. and Veldkamp, E.: Atmospheric methane uptake by tropical montane forest soils and the contribution of organic layers, *Biogeochemistry*, 111, 469–483, doi:10.1007/s10533-011-9681-0, 2012.
- 255 Zimmermann, M., Meir, P., Bird, M. I., Malhi, Y. and Ccahuana, A. J. Q.: Climate dependence of heterotrophic soil respiration from a soil-translocation experiment along a 3000 m tropical forest altitudinal gradient, *Eur. J. Soil Sci.*, 60, 895–906, doi:10.1111/j.1365-2389.2009.01175.x, 2009.
